# Supplementary material for: Differential expression of miRNAs and their target genes in senescing leaves and siliques: insights from deep sequencing of small RNAs and cleaved target RNAs
Source: PubMed Central journal article supplement (PMC4304344; doi:10.1111/pce.12393), 2014-08-13
Supplement: pce0038-0188-sd1.pdf [file pce0038-0188-sd1.pdf]

## SUPPORTING INFORMATION

| <b>Supplemental Table S1. Oligomers used in this study</b> |                                               |
|------------------------------------------------------------|-----------------------------------------------|
| <b>Primers used to amplify gene-specific probe</b>         |                                               |
| <b>Name</b>                                                | <b>Sequence</b>                               |
| 2PGK-Forward                                               | AGCTCGCCTAGGATGTCTGA                          |
| 2PGK-Reverse                                               | CATGGGGCACCCAAGAGAAT                          |
| AT1G72230-Forward                                          | GAATGGTTCGCTCGGGAAAGA                         |
| AT1G72230-Reverse                                          | CCAAAGCATCCAACGGCTTC                          |
| COX5B-1-Forward                                            | ACATTTGGGGAGTTTCTTCGC                         |
| COX5B-1-Reverse                                            | GGGATAACGAAAGAAGATGCGG                        |
| CSD1-Forward                                               | AGGCCAAGTAACAATGGCGA                          |
| CSD1-Reverse                                               | CAGCTTTAGCCCTGGAGACC                          |
| CSD2-Forward                                               | CCAAACGTCAAAACATAGCAGCA                       |
| CSD2-Reverse                                               | GGGTTGAAATGTGGTCTGTG                          |
| LAC3-Forward                                               | CCGTTTCGACAACACAACCAC                         |
| LAC3-Reverse                                               | TTCTCTGGCGTGACAATGCT                          |
| NLA-Forward                                                | GCCGTCGCCATTCGAAAAAT                          |
| NLA-Reverse                                                | TGCTTCTGCGGTTTTCAAGC                          |
| PHO2-Forward                                               | ACCGTTTCTCATCAAGGCGT                          |
| PHO2-Reverse                                               | GGTGACAGAGACACGCTCAA                          |
| PLANTACYANIN-Forward                                       | GTACACGGTCGGTGACTCTG                          |
| PLANTACYANIN-Reverse                                       | GAGACCGCACCGGATACTTT                          |
| TUA2-Forward                                               | CTGAGGTTTCGATGGTGCCCT                         |
| TUA2-Reverse                                               | CTACCGCCACAAGCAAGAGA                          |
| TUA4-Forward                                               | GCGTCTTCATAAACGCCCTTC                         |
| TUA4-Reverse                                               | ACAGCGTTGAAGACGAGGAA                          |
| TUA6-Forward                                               | ACAGCATCAAACACCTTCCTCA                        |
| TUA6-Reverse                                               | TGTAATGACCACGGGCGAAA                          |
| <b>Oligonucleotides used to detect sRNAs</b>               |                                               |
| <b>Name</b>                                                | <b>Sequence</b>                               |
| miR156a-g                                                  | GTGCTCACTCTTCTGTCA                            |
| miR157                                                     | GTGCTCTCTATCTTCTGTCAA                         |
| miR164                                                     | TGCACGTGCCCTGCTTCTCCA                         |
| miR398                                                     | AAGGGGTGACCTGAGAACACA                         |
| miR399                                                     | CAGGGCAAATCTCCTTTGGCA                         |
| miR408                                                     | GCCAGGGAAGAGGCAGTGCAT                         |
| miR447                                                     | CAACAAAACATCTCGTCCCAA                         |
| miR827                                                     | AGTTTGTGATGGTCATCTAA                          |
| sen-sRNA 1-2                                               | TTTTCTCCAAGGTTCAAGAA                          |
| sen-sRNA 3-4                                               | GATCCGTTCTTGAACCTTGCA                         |
| sen-sRNA5                                                  | AAACCCTTCACTTTGTGCAAT                         |
| <b>Bridge oligonucleotides to detect miRNAs</b>            |                                               |
| <b>Name</b>                                                | <b>Bridge oligo sequence</b>                  |
| miR396a                                                    | GAATGTCATAAGCGCAGTTCAAGAAAGCTGTGGAA           |
| miR396a*                                                   | GAATGTCATAAGCGCTTCCCACAGCTTTATTGAAC           |
| <b>Oligonucleotides used to make small RNA libraries</b>   |                                               |
| <b>Name</b>                                                | <b>Bridge oligo sequence</b>                  |
| 5' RNA adapter                                             | GUUCAGAGUUCUACAGUCCGACGAUC                    |
| 3' RNA adapter *                                           | UCGUAUGCCGUCUUCUGCUUG                         |
| RT primer                                                  | CAAGCAGAAGACGGCATAACGA                        |
| Forward PCR primer                                         | AATGATACGGCGACCACCGACAGGTTTCAGAGTTCTACAGTCCGA |
| Reverse PCR primer                                         | CAAGCAGAAGACGGCATAACGA                        |

**Supplemental Table S2. miRNA quantification from leaf and silique small RNA libraries.**

Values represent the abundance of the miRNA sequence in the indicated library (abbreviations as in Table 1) normalized to TP2M (transcripts per two million) trimmed genome-matched reads.

| miRNA          | miRNA sequence           | COLY    | COLM    | COLSeE  | COLSeL  | COSiY  | COSiM  | COSiES | COSiLS |
|----------------|--------------------------|---------|---------|---------|---------|--------|--------|--------|--------|
| ath-miR156a-f  | UGACAGAAGAGAGUGAGCAC     | 247,907 | 307,892 | 117,878 | 362,175 | 2,704  | 10,728 | 4,000  | 4,865  |
| ath-miR156g    | CGACAGAAGAGAGUGAGCAC     | 143     | 301     | 96      | 298     | 1      | 5      | 1      | 1      |
| ath-miR156h    | UGACAGAAGAAAGAGAGCAC     | 76      | 170     | 54      | 121     | 107    | 81     | 9      | 2      |
| ath-miR156i    | UGACAGAAGAGAGAGAGCAG     | 0       | 0       | 0       | 0       | 0      | 0      | 0      | 0      |
| ath-miR156j    | UGACAGAAGAGAGAGAGCAC     | 264     | 222     | 219     | 340     | 2      | 7      | 2      | 4      |
| ath-miR157a-c  | UUGACAGAAGAUAGAGAGCAC    | 582,372 | 770,809 | 398,060 | 187,224 | 154    | 76     | 18     | 12     |
| ath-miR157d    | UGACAGAAGAUAGAGAGCAC     | 47,761  | 68,392  | 25,909  | 24,151  | 9      | 6      | 1      | 1      |
| ath-miR158a    | UCCCAAUGUAGACAAAGCA      | 9,240   | 9,345   | 3,420   | 5,016   | 23,727 | 21,819 | 10,342 | 9,868  |
| ath-miR158b    | CCCAAUGUAGACAAAGCA       | 4       | 7       | 1       | 3       | 44     | 22     | 5      | 4      |
| ath-miR159a    | UUUGGAUUGAAGGGAGCUCUA    | 370     | 267     | 123     | 458     | 8,856  | 8,803  | 4,064  | 12,020 |
| ath-miR159b    | UUUGGAUUGAAGGGAGCUCUU    | 69      | 41      | 22      | 64      | 9,345  | 11,766 | 1,547  | 1,678  |
| ath-miR159c    | UUUGGAUUGAAGGGAGCUCCU    | 0       | 0       | 0       | 0       | 10     | 6      | 2      | 2      |
| ath-miR160a-c  | UGCCUGGCUCCUGUAUGCCA     | 86      | 81      | 215     | 70      | 4      | 3      | 2      | 3      |
| ath-miR161.1   | UGAAAGUGACUACAUCGGGGU    | 301     | 377     | 335     | 228     | 1,021  | 884    | 282    | 302    |
| ath-miR161.2   | UCA AUGCAUUGAAAGUGACUA   | 970     | 497     | 1,248   | 988     | 155    | 219    | 89     | 113    |
| ath-miR162a-d  | UCGAUAAACCUCUGCAUCCAG    | 643     | 402     | 111     | 178     | 960    | 743    | 560    | 891    |
| ath-miR163     | UUGAAGAGGACUUGGAACUUCGAU | 123     | 24      | 126     | 475     | 587    | 519    | 233    | 373    |
| ath-miR164a-b  | UGGAGAAGCAGGGCAGUGCA     | 5,680   | 5,485   | 2,149   | 1,049   | 2      | 1      | 0      | 0      |
| ath-miR164c    | UGGAGAAGCAGGGCAGUGCG     | 631     | 1,009   | 1,123   | 1,047   | 0      | 0      | 0      | 0      |
| ath-miR165a-g  | UCGGACCAGGCUUAUCCCCC     | 1,019   | 315     | 238     | 530     | 48,667 | 30,592 | 23,711 | 11,641 |
| ath-miR167a-b  | UGAAGCUGCCAGCAUGAUCUA    | 102,116 | 124,412 | 226,822 | 151,561 | 560    | 394    | 91     | 135    |
| ath-miR167c    | UAAGCUGCCAGCAUGAUCUUG    | 1       | 2       | 0       | 0       | 0      | 1      | 0      | 0      |
| ath-miR167d    | UGAAGCUGCCAGCAUGAUCUGG   | 3,912   | 2,604   | 2,917   | 3,815   | 315    | 343    | 125    | 490    |
| ath-miR168a-b  | UCGCUUGGUGCAGGUCGGGAA    | 32,540  | 65,832  | 21,598  | 20,144  | 2,448  | 805    | 420    | 292    |
| ath-miR169a    | CAGCCAAGGAUGACUUGCCGA    | 43      | 40      | 38      | 6       | 3      | 2      | 0      | 0      |
| ath-miR169b-f  | CAGCCAAGGAUGACUUGCCGG    | 1       | 2       | 6       | 7       | 0      | 0      | 0      | 0      |
| ath-miR169g-3p | UCCGGCAAGUUGACCUUGGCU    | 1       | 0       | 0       | 0       | 0      | 0      | 0      | 0      |
| ath-miR169g-5p | UGAGCCAAGGAUGACUUGCCG    | 41      | 46      | 66      | 116     | 3      | 2      | 0      | 0      |
| ath-miR169h-n  | UAGCCAAGGAUGACUUGCCUG    | 26      | 6       | 7       | 3       | 22     | 18     | 2      | 2      |
| ath-miR170     | UGAUUGAGCCGUGUCAUAUC     | 3       | 0       | 0       | 5       | 36     | 27     | 9      | 16     |
| ath-miR171a    | UGAUUGAGCCGCGCAUAUC      | 31      | 20      | 18      | 17      | 126    | 59     | 27     | 60     |
| ath-miR171b-c  | UUGAGCCGUGCAUAUCACG      | 7       | 7       | 2       | 3       | 30     | 20     | 4      | 4      |
| ath-miR172a-b  | AGAAUCUUGAUGAUGCUGCAU    | 22,101  | 19,377  | 38,208  | 37,530  | 24     | 8      | 2      | 2      |
| ath-miR172b-5p | GCAGCACCAUUAAGAUUCAC     | 7       | 7       | 15      | 9       | 0      | 0      | 0      | 0      |
| ath-miR172c-d  | AGAAUCUUGAUGAUGCUGCAG    | 3       | 4       | 8       | 43      | 162    | 58     | 8      | 5      |
| ath-miR172e    | GGAAUCUUGAUGAUGCUGCAU    | 43      | 19      | 49      | 71      | 3      | 1      | 0      | 0      |
| ath-miR173-3p  | UGAUUCUCUGUGUAAGCGAAA    | 18      | 14      | 48      | 38      | 2      | 1      | 1      | 1      |





|                |                        |       |       |       |       |    |    |   |   |
|----------------|------------------------|-------|-------|-------|-------|----|----|---|---|
| ath-miR5019    | UGUUGGGAAGAAAAACUCUU   | 0     | 0     | 0     | 0     | 0  | 0  | 0 | 0 |
| ath-miR5020a   | UGGAAGAAGGUGAGACUUGCA  | 3     | 1     | 0     | 0     | 0  | 0  | 0 | 0 |
| ath-miR5020b   | AUGGCAUGAAAGAAGGUGAGA  | 152   | 393   | 218   | 75    | 1  | 1  | 0 | 0 |
| ath-miR5020c   | UGGCAUGGAAGAAGGUGAGAC  | 1     | 2     | 2     | 0     | 0  | 0  | 0 | 0 |
| ath-miR5021    | UGAGAAGAAGAAGAAGAAAA   | 0     | 0     | 0     | 0     | 0  | 0  | 0 | 0 |
| ath-miR5022    | GUCAUGGGUAUGAUCGAAUG   | 0     | 0     | 0     | 0     | 0  | 0  | 0 | 0 |
| ath-miR5023    | AUUGGUAGUGGAUAAGGGGGC  | 0     | 1     | 0     | 0     | 0  | 0  | 0 | 0 |
| ath-miR5024-3p | CCGUAUUCUUGCCUUGUCAUU  | 0     | 0     | 0     | 0     | 2  | 1  | 1 | 1 |
| ath-miR5024-5p | AUGACAAGGCCAAGAUUAACA  | 0     | 0     | 0     | 1     | 0  | 0  | 0 | 0 |
| ath-miR5025    | ACUGUAUAUAUGUAAGUGACA  | 0     | 0     | 0     | 0     | 0  | 0  | 0 | 0 |
| ath-miR5026    | ACUCAUAAGAUCGUGACACGU  | 5,934 | 7,542 | 2,899 | 3,863 | 4  | 5  | 2 | 4 |
| ath-miR5027    | ACCGGUUGGAACUUGCCUAAA  | 0     | 0     | 0     | 0     | 0  | 0  | 0 | 0 |
| ath-miR5028    | AAUUGGGUUUAUGCUAGAGUU  | 0     | 0     | 0     | 0     | 1  | 1  | 0 | 0 |
| ath-miR5029    | AAUGAGAGAGAACACUGCAAA  | 0     | 0     | 0     | 0     | 1  | 2  | 0 | 0 |
| ath-miR5595a-b | ACAUUGAUCUGCAUCUUUGC   | 0     | 1     | 0     | 0     | 19 | 12 | 0 | 0 |
| ath-miR5628    | GAAAUAGCGAAGAUUAUGAUUA | 0     | 0     | 0     | 0     | 0  | 0  | 0 | 0 |
| ath-miR5629    | UUAGGGUAGUUAACGGAAGUUA | 2     | 1     | 0     | 0     | 0  | 0  | 0 | 0 |
| ath-miR5630a-b | GCUAAGAGCGGUUCUGAUGGA  | 0     | 0     | 0     | 0     | 0  | 0  | 0 | 0 |
| ath-miR5631    | UGGCAGGAAAGACAUAUUUUU  | 0     | 0     | 0     | 0     | 0  | 0  | 0 | 0 |
| ath-miR5632    | UUGGAUUUAUAGUUGGAUAAG  | 0     | 0     | 0     | 0     | 0  | 0  | 0 | 0 |
| ath-miR5633    | UAUGAUCACAGAAAACAGUG   | 1     | 1     | 0     | 0     | 0  | 0  | 0 | 0 |
| ath-miR5634    | AGGGACUUUGUGAAUUUAGGG  | 1     | 0     | 0     | 6     | 0  | 0  | 0 | 0 |
| ath-miR5635a-d | UGUUAAGGAGUGUUAACGGUG  | 2     | 2     | 0     | 0     | 0  | 0  | 0 | 0 |
| ath-miR5636    | CGUAGUUGCAGAGCUUGACGG  | 2     | 1     | 0     | 0     | 0  | 0  | 0 | 0 |
| ath-miR5637    | AAUGCGCAACUCUAUAUUUCC  | 0     | 0     | 0     | 0     | 1  | 1  | 0 | 0 |
| ath-miR5638a   | AUACCAAAACUCUCACUUU    | 0     | 0     | 0     | 0     | 0  | 0  | 0 | 0 |
| ath-miR5638b   | ACAGUGGUCAUCUGGUGGGCU  | 0     | 0     | 0     | 0     | 3  | 5  | 1 | 1 |
| ath-miR5639    | UAGUCCACUGUGUCUAAGGC   | 2     | 1     | 2     | 3     | 2  | 1  | 0 | 1 |
| ath-miR5640    | UGAGAGAAGGAAUAGAUUCA   | 1     | 1     | 2     | 0     | 2  | 2  | 0 | 0 |
| ath-miR5641    | UGGAAGAAGAUGAUAGAAUUA  | 0     | 0     | 0     | 7     | 0  | 0  | 0 | 0 |
| ath-miR5642a-b | UCUCGCGCUUGUACGGCUUU   | 16    | 19    | 3     | 1     | 1  | 1  | 0 | 0 |
| ath-miR5643a-b | AGGCUUUUAAGAUUGGUUGC   | 4     | 4     | 9     | 0     | 1  | 0  | 0 | 0 |
| ath-miR5644    | GUGGGUUGCGGAUAACGGUA   | 1     | 2     | 1     | 0     | 0  | 0  | 0 | 0 |
| ath-miR5645a-b | AUUUGAGUCAUGUCGUUAAG   | 0     | 0     | 0     | 0     | 0  | 0  | 0 | 0 |
| ath-miR5645c   | AACCUAUUUACGACAUGACU   | 0     | 0     | 0     | 0     | 0  | 0  | 0 | 0 |
| ath-miR5646    | GUUCGAGGCACGUUGGGAGG   | 0     | 0     | 0     | 0     | 0  | 0  | 0 | 0 |
| ath-miR5647    | UCAAGUUUGAUGACGAUCCA   | 1     | 1     | 0     | 0     | 0  | 0  | 0 | 0 |
| ath-miR5648-3p | AUCUGAAGAAAUAAGCGGCAU  | 22    | 30    | 52    | 0     | 0  | 0  | 0 | 0 |
| ath-miR5648-5p | UUUGGAAAUUUUGGCUUGACU  | 9     | 3     | 9     | 8     | 1  | 0  | 0 | 0 |
| ath-miR5649a-b | AUUGAAUAUGUUGGUUACUUA  | 0     | 0     | 0     | 0     | 0  | 0  | 0 | 0 |
| ath-miR5650    | UUGUUUUGGAUCUUAGAUACA  | 0     | 0     | 0     | 0     | 1  | 7  | 4 | 1 |

|                |                          |     |     |     |     |    |    |    |    |
|----------------|--------------------------|-----|-----|-----|-----|----|----|----|----|
| ath-miR5651    | UUGUGCGGUUCAAUAGUAAC     | 3   | 6   | 4   | 6   | 12 | 18 | 7  | 5  |
| ath-miR5652    | UUGAAUGUGAAUGAACGGGC     | 7   | 6   | 6   | 0   | 0  | 0  | 0  | 1  |
| ath-miR5653    | UGGGUUGAGUUGAGUUGGUUGGC  | 4   | 1   | 5   | 1   | 0  | 1  | 2  | 1  |
| ath-miR5654-3p | UGGAAGAUGC UUUGGGAUUUAAU | 11  | 5   | 25  | 15  | 0  | 0  | 0  | 0  |
| ath-miR5654-5p | AUAAAUCCCAACAUCUCCA      | 0   | 1   | 1   | 0   | 0  | 0  | 0  | 0  |
| ath-miR5655    | AAGUAGACACAUAAGAAGGAG    | 1   | 2   | 5   | 8   | 0  | 0  | 0  | 0  |
| ath-miR5656    | ACUGAAGUAGAUUGGGUUU      | 4   | 4   | 15  | 6   | 0  | 0  | 0  | 0  |
| ath-miR5657    | UGGACAAGGUAGAUUUGGUG     | 0   | 1   | 0   | 0   | 0  | 0  | 0  | 0  |
| ath-miR5658    | AUGAUGAUGAUGAUGAUGAAA    | 0   | 0   | 0   | 0   | 0  | 0  | 0  | 0  |
| ath-miR5659    | CGAUGAAGGUCUUUGAACGGUA   | 22  | 7   | 16  | 37  | 0  | 0  | 1  | 0  |
| ath-miR5660    | CAGGUGGUUAGUGCAAUGGAA    | 0   | 0   | 0   | 0   | 0  | 0  | 0  | 0  |
| ath-miR5661    | AGAGGUACAUCAUGUAGUCUG    | 5   | 5   | 0   | 7   | 0  | 0  | 0  | 0  |
| ath-miR5662    | AGAGGUGACCAUUGGAGAUG     | 0   | 0   | 0   | 0   | 0  | 0  | 0  | 0  |
| ath-miR5663    | AGCUAAGGAUUUGCAUUCUCA    | 13  | 11  | 17  | 7   | 1  | 1  | 0  | 0  |
| ath-miR5664    | AUAGUCAAUUUUAUCGGUCUG    | 1   | 1   | 3   | 0   | 0  | 0  | 0  | 0  |
| ath-miR5665    | UUGGUGGACAAGAUCUGGGAU    | 0   | 0   | 0   | 0   | 0  | 0  | 0  | 0  |
| ath-miR5666    | AUGGGACAUCGAGCAUUUAAU    | 0   | 0   | 0   | 0   | 0  | 1  | 0  | 0  |
| ath-miR5996    | UGACAUCCAGAUAGAAGCUUUG   | 112 | 81  | 71  | 71  | 0  | 0  | 0  | 0  |
| ath-miR5997    | UGAAACCAAGUAGCUAAAUAG    | 2   | 1   | 11  | 7   | 0  | 0  | 0  | 0  |
| ath-miR5998a-b | ACAGUUUGUUUUUGUUUUGU     | 0   | 0   | 4   | 0   | 0  | 0  | 0  | 0  |
| ath-miR5999    | UCUUCACUAUUAGACGGACAA    | 5   | 4   | 0   | 10  | 0  | 0  | 0  | 0  |
| ath-miR771     | UGAGCCUCUGUGGUAGCCUCA    | 0   | 0   | 0   | 0   | 11 | 2  | 0  | 0  |
| ath-miR773a    | UUUGCUUCCAGCUUUUGUCUC    | 0   | 0   | 0   | 0   | 0  | 0  | 0  | 0  |
| ath-miR773b-3p | UUUGAUUCCAGCUUUUGUCUC    | 0   | 0   | 0   | 0   | 0  | 0  | 0  | 0  |
| ath-miR773b-5p | GGCAAUAACUUGAGCAAACA     | 0   | 0   | 0   | 0   | 0  | 0  | 0  | 0  |
| ath-miR774a    | UUGGUUACCCAUAUGGCCAUC    | 0   | 0   | 0   | 0   | 5  | 1  | 0  | 0  |
| ath-miR774b-3p | CAUCCAUAUUUUAUCUCGAA     | 0   | 0   | 0   | 0   | 0  | 0  | 0  | 0  |
| ath-miR774b-5p | UGAGAUGAAGAUUUGGGUGAU    | 0   | 0   | 0   | 0   | 0  | 0  | 0  | 0  |
| ath-miR775     | UUCGAUGUCUAGCAGUGCCA     | 8   | 16  | 10  | 7   | 34 | 25 | 4  | 3  |
| ath-miR776     | UCUAAGUCUUCUAUUGAUGUU    | 0   | 0   | 0   | 0   | 0  | 0  | 0  | 0  |
| ath-miR777     | UACGCAUUGAGUUUCGUUGCUU   | 3   | 1   | 5   | 14  | 60 | 26 | 3  | 3  |
| ath-miR778     | UGGCUUGGUUUUGUACACCG     | 0   | 0   | 0   | 0   | 0  | 0  | 0  | 0  |
| ath-miR779.1   | UUCUGCUAUGUUGCUGCUCAU    | 0   | 0   | 0   | 0   | 0  | 0  | 0  | 0  |
| ath-miR779.2   | UGAUUGGAAUUUCGUUGACU     | 0   | 1   | 0   | 6   | 31 | 40 | 19 | 17 |
| ath-miR780.1   | UCUAGCAGCUGUUGAGCAGGU    | 0   | 0   | 0   | 0   | 2  | 1  | 0  | 0  |
| ath-miR780.2   | UUCUUCGUGAAUAUCUGGCAU    | 0   | 0   | 0   | 0   | 17 | 31 | 1  | 2  |
| ath-miR781a-b  | UUAGAGUUUUCUGGAUACUUA    | 2   | 1   | 0   | 0   | 46 | 56 | 12 | 14 |
| ath-miR782     | ACAAACACCUUGGAUGUUCUU    | 0   | 0   | 0   | 0   | 0  | 0  | 0  | 0  |
| ath-miR822     | UGCGGAAGCAUUUGCACAUG     | 492 | 396 | 456 | 189 | 12 | 8  | 1  | 0  |
| ath-miR823     | UGGGUGGUGAUCAUAUAGAU     | 11  | 16  | 32  | 30  | 4  | 4  | 2  | 2  |
| ath-miR824     | UAGACCAUUUGUGAGAAGGGA    | 342 | 484 | 926 | 483 | 33 | 52 | 30 | 99 |

|                |                          |     |     |     |     |     |     |     |     |
|----------------|--------------------------|-----|-----|-----|-----|-----|-----|-----|-----|
| ath-miR825     | UUCUCAAGAAGGUGCAUGAAC    | 203 | 276 | 193 | 97  | 1   | 2   | 1   | 1   |
| ath-miR826     | UAGUCCGGUUUUGGAUACGUG    | 0   | 2   | 1   | 16  | 2   | 2   | 5   | 11  |
| ath-miR827     | UUAGAUGACCAUCAACAAACU    | 165 | 187 | 520 | 470 | 197 | 334 | 62  | 15  |
| ath-miR828     | UCUUGCUUAAAUGAGUAUUGCA   | 0   | 0   | 0   | 0   | 1   | 1   | 0   | 0   |
| ath-miR829.1   | AGCUCUGAUACCAAAUGAUGGAAU | 1   | 0   | 1   | 9   | 6   | 2   | 4   | 6   |
| ath-miR829.2   | CAAAUUAAGCUUCAAGGUAG     | 0   | 0   | 0   | 0   | 0   | 0   | 0   | 0   |
| ath-miR830-3p  | UAACUAUUUUGAGAAGAAGUG    | 0   | 2   | 17  | 0   | 1   | 0   | 0   | 1   |
| ath-miR830-5p  | UCUUCUCCAAUAGUUUAGGUU    | 0   | 0   | 1   | 0   | 2   | 1   | 0   | 1   |
| ath-miR831     | UGAUCUCUUCGUACUCUUCUUG   | 0   | 0   | 0   | 0   | 1   | 1   | 0   | 0   |
| ath-miR832-3p  | UUGAUUCCCAAUCAAGCAAG     | 0   | 0   | 0   | 0   | 3   | 1   | 0   | 0   |
| ath-miR832-5p  | UGCUGGGAUCGGAAUCGAAA     | 0   | 0   | 0   | 0   | 4   | 1   | 1   | 0   |
| ath-miR833a-3p | UAGACCGAUGUCAACAAACAAG   | 4   | 1   | 3   | 0   | 1   | 0   | 0   | 0   |
| ath-miR833a-5p | UGUUUGUUGUACUCGGUCUAGU   | 0   | 0   | 0   | 5   | 2   | 1   | 1   | 1   |
| ath-miR833b    | UGUUUGUUGACAUCGGUCUAG    | 6   | 4   | 1   | 0   | 0   | 0   | 0   | 0   |
| ath-miR834     | UGGUAGCAGUAGCGGUGGUAA    | 1   | 2   | 2   | 0   | 0   | 0   | 0   | 0   |
| ath-miR835-3p  | UGGAGAAGAUACGCAAGAAAG    | 1   | 1   | 0   | 0   | 0   | 0   | 0   | 0   |
| ath-miR835-5p  | UUCUUGCAUAUGUUCUUUAUC    | 0   | 0   | 0   | 0   | 0   | 0   | 0   | 0   |
| ath-miR836     | UCCUGUGUUCCUUUGAUGCGUGG  | 0   | 0   | 0   | 0   | 0   | 0   | 0   | 0   |
| ath-miR837-3p  | AAACGAACAAAAACUGAUGG     | 2   | 3   | 3   | 0   | 0   | 0   | 0   | 0   |
| ath-miR837-5p  | AUCAGUUUCUUGUUCGUUUCA    | 0   | 0   | 0   | 0   | 0   | 0   | 0   | 0   |
| ath-miR838     | UUUCUUCUACUUCUUGCACA     | 0   | 0   | 0   | 0   | 0   | 0   | 0   | 0   |
| ath-miR839     | UACCAACCUUCAUCGUUCCC     | 0   | 0   | 0   | 0   | 2   | 1   | 1   | 0   |
| ath-miR840     | ACACUGAAGGACCUAAACU AAC  | 2   | 2   | 3   | 28  | 20  | 13  | 2   | 1   |
| ath-miR841a    | UACGAGCCACUUGAAACUGAA    | 102 | 62  | 21  | 28  | 6   | 24  | 11  | 10  |
| ath-miR841b-3p | CAAUUUCUAGUGGGUCGUAAU    | 4   | 2   | 3   | 0   | 0   | 0   | 0   | 0   |
| ath-miR841b-5p | UACGAGCCACUGGAAACUGAA    | 15  | 14  | 5   | 6   | 7   | 13  | 4   | 2   |
| ath-miR842     | UCAUGGUCAGAUCGCUAUCC     | 7   | 7   | 0   | 13  | 56  | 39  | 3   | 3   |
| ath-miR843     | UUUAGGUCGAGCUUCAUUGGA    | 124 | 177 | 215 | 177 | 10  | 17  | 3   | 7   |
| ath-miR844-3p  | UUUAAGCCAUCUACUAGUU      | 1   | 1   | 0   | 0   | 3   | 2   | 1   | 1   |
| ath-miR844-5p  | UGGUAAGAUUGCUUUAAGCU     | 0   | 1   | 3   | 0   | 0   | 0   | 0   | 0   |
| ath-miR845a    | CGGCUCUGAUACCAAUUGAUG    | 0   | 1   | 1   | 0   | 174 | 117 | 39  | 71  |
| ath-miR845b    | UCGCUCUGAUACCAAAUUGAUG   | 0   | 0   | 0   | 0   | 64  | 34  | 8   | 12  |
| ath-miR846     | UUGAAUUGAAGUGCUUGAAU     | 5   | 3   | 5   | 6   | 136 | 496 | 170 | 217 |
| ath-miR847     | UCACUCCUCUUCUUCUUGAUG    | 0   | 0   | 0   | 0   | 1   | 1   | 0   | 0   |
| ath-miR848     | UGACAUGGGACUGCCUAAGCUA   | 24  | 18  | 21  | 14  | 9   | 8   | 2   | 1   |
| ath-miR849     | UAACUAAACAUUGGUGUAGUA    | 3   | 1   | 3   | 3   | 0   | 0   | 0   | 0   |
| ath-miR850     | UAAGAUCGGACUACAACAAG     | 6   | 7   | 5   | 8   | 4   | 6   | 3   | 1   |
| ath-miR851-3p  | UGGGUGGCAAACAAGACGAC     | 2   | 1   | 5   | 0   | 0   | 0   | 0   | 0   |
| ath-miR851-5p  | UCUCGGUUCGCGAUCCACAAG    | 0   | 0   | 0   | 0   | 4   | 1   | 0   | 0   |
| ath-miR852     | AAGAUAAAGCGCCUUAGUUCUG   | 1   | 0   | 0   | 0   | 0   | 0   | 0   | 1   |
| ath-miR853     | UCCCCUUUAGCUUGGAGAAG     | 0   | 0   | 0   | 3   | 11  | 5   | 1   | 0   |

|               |                                |                  |                  |                |                |                |                |               |               |
|---------------|--------------------------------|------------------|------------------|----------------|----------------|----------------|----------------|---------------|---------------|
| ath-miR854a-e | GAUGAGGAUAGGGAGGAGGAG          | 0                | 0                | 0              | 0              | 0              | 0              | 0             | 0             |
| ath-miR855    | AGCAAAAGCUAAGGAAAAGGAA         | 0                | 0                | 0              | 0              | 0              | 0              | 0             | 0             |
| ath-miR856    | UAAUCCUACCAUAACUUCAGC          | 0                | 0                | 0              | 0              | 0              | 0              | 0             | 0             |
| ath-miR857    | UUUUGUAUGUUGAAGGUGUAU          | 2                | 2                | 0              | 0              | 0              | 0              | 0             | 0             |
| ath-miR858a   | UUUCGUUGUCUGUUCGACCUU          | 0                | 0                | 0              | 0              | 104            | 98             | 32            | 62            |
| ath-miR858b   | UUCGUUGUCUGUUCGACCUUG          | 0                | 0                | 0              | 0              | 64             | 64             | 20            | 29            |
| ath-miR859    | UCUCUCUGUUGUGAAGUCAAA          | 0                | 0                | 0              | 0              | 7              | 3              | 0             | 0             |
| ath-miR860    | UCAAUAGAUUGGACUAUGUAU          | 5                | 4                | 0              | 11             | 11             | 13             | 4             | 6             |
| ath-miR861-3p | GAUGGAUUGUCUCAAGGAC            | 7                | 8                | 7              | 8              | 3              | 3              | 4             | 6             |
| ath-miR861-5p | CCUUGGAGAAAUAUGCGUCA           | 1                | 0                | 0              | 0              | 0              | 0              | 0             | 0             |
| ath-miR862-3p | AUAUGCUGAUCUACUUGAAG           | 0                | 0                | 0              | 0              | 0              | 0              | 0             | 0             |
| ath-miR862-5p | UCCAUAAGGUCGAGCAUGUGC          | 1                | 1                | 0              | 0              | 0              | 0              | 0             | 0             |
| ath-miR863-3p | UUGAGAGCAACAAGACAUAAU          | 197              | 160              | 157            | 62             | 2              | 3              | 1             | 1             |
| ath-miR863-5p | UUAUGUCUUGUUGAUCUCAAU          | 1                | 0                | 0              | 0              | 0              | 0              | 0             | 0             |
| ath-miR864-3p | UAAAGUCAAAUAUACCUUGAAG         | 0                | 0                | 0              | 0              | 1              | 0              | 0             | 0             |
| ath-miR864-5p | UCAGGUAUGAUUGACUUCAAA          | 24               | 16               | 30             | 0              | 0              | 0              | 0             | 0             |
| ath-miR865-3p | UUUUUCCUCAAAUUUAUCCAA          | 0                | 0                | 0              | 0              | 0              | 0              | 0             | 0             |
| ath-miR865-5p | AUGAAUUUGGAUCUAAUUGAG          | 0                | 0                | 0              | 0              | 1              | 0              | 0             | 0             |
| ath-miR866-3p | ACAAAUCCGUCUUGAAGA             | 2                | 3                | 3              | 9              | 4              | 5              | 9             | 9             |
| ath-miR866-5p | UCAAGGAACGGAUUUUGUAAA          | 1                | 2                | 0              | 7              | 0              | 0              | 0             | 0             |
| ath-miR867    | UUGAACAUUGUUUAUUAGGAA          | 0                | 0                | 0              | 0              | 0              | 0              | 0             | 0             |
| ath-miR868-3p | CUUCUUAAGUGCUGAUAAUGC          | 0                | 0                | 0              | 0              | 0              | 0              | 0             | 0             |
| ath-miR868-5p | UCAUGUCGUAUAGUAGUCAC           | 0                | 0                | 0              | 0              | 0              | 0              | 0             | 0             |
| ath-miR869.1  | AUUGGUCAAUUCUGGUGUUG           | 0                | 0                | 0              | 0              | 0              | 0              | 0             | 0             |
| ath-miR869.2  | UCUGGUGUUGAGAUAGUUGAC          | 10               | 12               | 7              | 0              | 107            | 113            | 12            | 3             |
| ath-miR870    | UAAUUUGGUGUUUCUUCGAUC          | 1                | 0                | 0              | 0              | 0              | 0              | 0             | 0             |
|               | <b>Sum of miRNA Abundance:</b> | <b>1,076,444</b> | <b>1,400,822</b> | <b>864,391</b> | <b>816,957</b> | <b>123,689</b> | <b>108,373</b> | <b>50,384</b> | <b>48,219</b> |



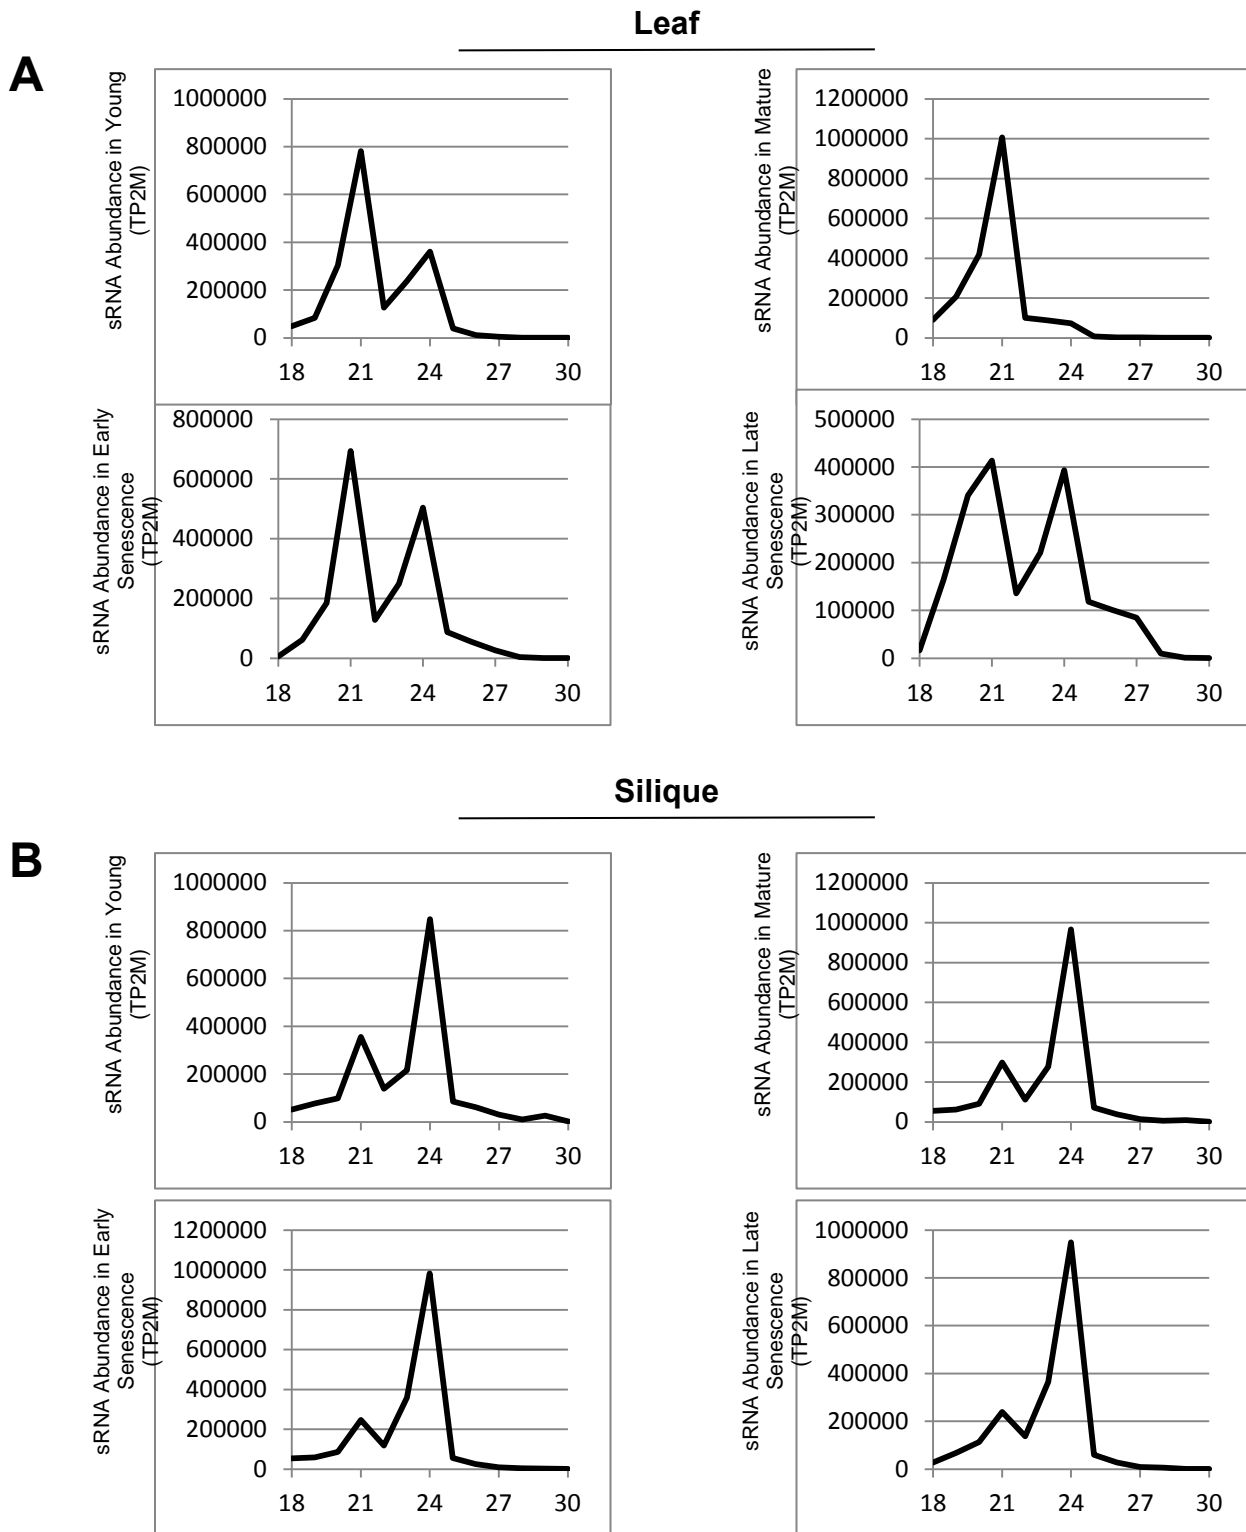

**Figure S1. Small RNA size distribution plots.**

Genome-matched small RNA data were normalized to transcripts per two million (TP2M) and the total abundance of each size class of small RNA was plotted. (A) Size distributions in young, mature, early senescing and late senescing leaf. (B) Size distributions in young, mature, early senescing and late senescing silique.

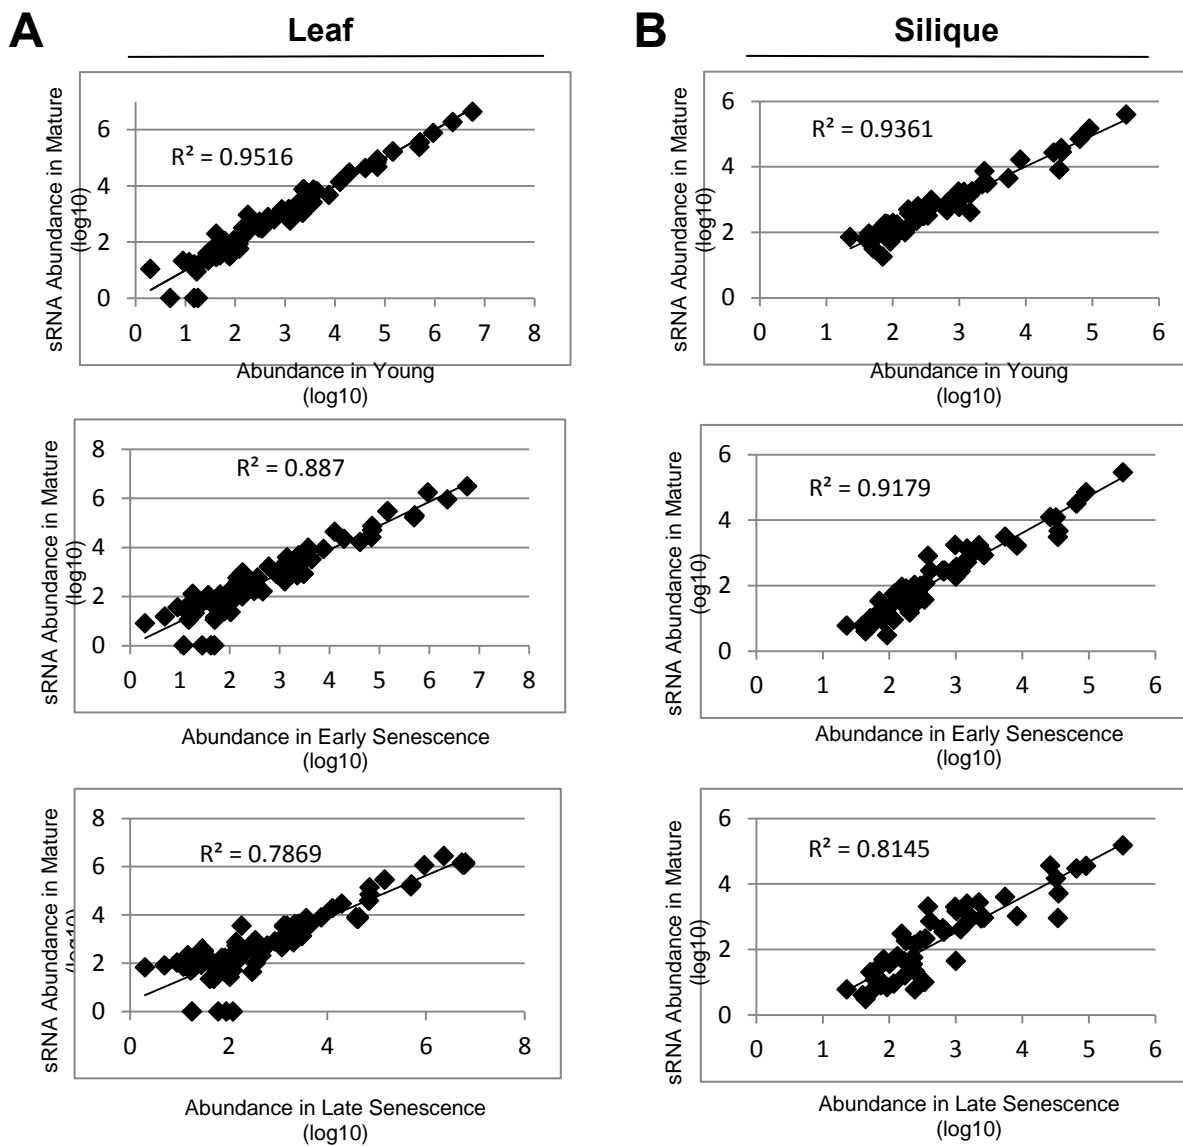

**Figure S2. Comparison of miRNA abundance between mature and other stages**

miRNA abundance comparison between mature and other stages. Correlation coefficients for each comparison are also shown. (A) Mature leaves compared to young leaves, early senescing leaves and late senescing leaves. (B) Mature siliques compared to young siliques, early senescing siliques and late senescing siliques.
